# Supplementary material
Source: publisher figshare collection journal article supplement (https://gsajournals.figshare.com/ndownloader/files/21518883)
Supplement: Supplementary file 1 [file 21518883]

**Table S1.** C**a**ndidates alternative splicing in F01.

| QueryName | SubjectName | QhspStart1 | QhspEnd1 | QhspStart2 | QhspEnd2 | ShspStart1 | ShspEnd1 | ShspStart2 | ShspEnd2 |
| --- | --- | --- | --- | --- | --- | --- | --- | --- | --- |
| F01.PB32905 | F01.PB33942 | 302 | 2349 | 50 | 306 | 814 | 2861 | 1 | 257 |
| F01.PB17159 | F01.PB7184 | 441 | 1037 | 7 | 445 | 651 | 1247 | 1 | 437 |
| F01.PB36789 | F01.PB36567 | 1523 | 3070 | 1 | 1524 | 1759 | 3306 | 27 | 1550 |
| F01.PB12215 | F01.PB24639 | 139 | 1459 | 1 | 142 | 971 | 2285 | 24 | 164 |
| F01.PB25016 | F01.PB27314 | 500 | 2017 | 65 | 500 | 810 | 2326 | 1 | 436 |
| F01.PB26323 | F01.PB44796 | 532 | 2540 | 56 | 533 | 619 | 2627 | 4 | 481 |
| F01.PB33964 | F01.PB32998 | 225 | 2533 | 1 | 224 | 455 | 2764 | 79 | 300 |
| F01.PB31343 | F01.PB39095 | 1065 | 2766 | 1 | 1067 | 1527 | 3208 | 23 | 1088 |
| F01.PB16734 | F01.PB20371 | 1 | 1026 | 1022 | 1307 | 30 | 1055 | 1172 | 1457 |
| F01.PB27774 | F01.PB33936 | 446 | 2218 | 5 | 451 | 1099 | 2869 | 61 | 508 |
| F01.PB32525 | F01.PB25336 | 177 | 2516 | 1 | 176 | 373 | 2707 | 5 | 180 |
| F01.PB34747 | F01.PB31087 | 1 | 1977 | 1978 | 2825 | 1 | 1980 | 2082 | 2929 |
| F01.PB35992 | F01.PB32232 | 1 | 2457 | 2455 | 2746 | 11 | 2466 | 2632 | 2923 |
| F01.PB36215 | F01.PB32319 | 118 | 2795 | 1 | 119 | 295 | 2960 | 6 | 124 |
| F01.PB43974 | F01.PB23819 | 567 | 2164 | 6 | 571 | 706 | 2293 | 1 | 566 |
| F01.PB35988 | F01.PB34415 | 110 | 2785 | 1 | 109 | 226 | 2902 | 3 | 111 |
| F01.PB44140 | F01.PB38050 | 195 | 2073 | 1 | 195 | 339 | 2210 | 3 | 197 |
| F01.PB31061 | F01.PB25322 | 1 | 1773 | 1772 | 2007 | 1 | 1774 | 1874 | 2109 |
| F01.PB31544 | F01.PB31815 | 1 | 2165 | 2164 | 2437 | 12 | 2174 | 2302 | 2575 |
| F01.PB27917 | F01.PB22718 | 150 | 2303 | 1 | 150 | 314 | 2465 | 32 | 181 |
| F01.PB22154 | F01.PB44293 | 317 | 2402 | 9 | 318 | 680 | 2762 | 12 | 321 |
| F01.PB22295 | F01.PB37102 | 1 | 1106 | 1106 | 2250 | 868 | 1973 | 2101 | 3231 |
| F01.PB34570 | F01.PB29576 | 1368 | 2633 | 1 | 1369 | 1489 | 2754 | 1 | 1371 |
| F01.PB35121 | F01.PB38666 | 224 | 2877 | 1 | 225 | 936 | 3588 | 468 | 692 |
| F01.PB28400 | F01.PB37117 | 1 | 1939 | 1935 | 2686 | 681 | 2620 | 2839 | 3590 |
| F01.PB7523 | F01.PB28344 | 11 | 1433 | 1431 | 1645 | 1 | 1438 | 1601 | 1811 |
| F01.PB23201 | F01.PB36016 | 1 | 2013 | 2013 | 2572 | 59 | 2067 | 2169 | 2728 |
| F01.PB17131 | F01.PB31082 | 105 | 1865 | 1 | 104 | 237 | 1999 | 4 | 107 |
| F01.PB21029 | F01.PB31646 | 120 | 2065 | 1 | 122 | 749 | 2694 | 1 | 122 |
| F01.PB17609 | F01.PB24639 | 107 | 1482 | 1 | 110 | 971 | 2339 | 56 | 164 |
| F01.PB25784 | F01.PB33385 | 1 | 2151 | 2150 | 2708 | 4 | 2160 | 2508 | 3066 |
| F01.PB33524 | F01.PB33593 | 191 | 2578 | 1 | 193 | 400 | 2787 | 99 | 291 |
| F01.PB36097 | F01.PB32633 | 176 | 2421 | 1 | 178 | 354 | 2599 | 3 | 180 |
| F01.PB36786 | F01.PB39661 | 12 | 2783 | 2783 | 2996 | 1 | 2772 | 2877 | 3090 |
| F01.PB27844 | F01.PB29830 | 1 | 1815 | 1816 | 2215 | 1 | 1816 | 1916 | 2315 |
| F01.PB45817 | F01.PB38643 | 1367 | 3059 | 1 | 1368 | 1988 | 3679 | 498 | 1865 |
| F01.PB45817 | F01.PB45315 | 197 | 3100 | 1 | 198 | 764 | 3667 | 444 | 641 |
| F01.PB22295 | F01.PB37479 | 1 | 1106 | 1106 | 2250 | 900 | 2005 | 2133 | 3263 |
| F01.PB21468 | F01.PB21557 | 1 | 2162 | 2162 | 2462 | 1 | 2155 | 2276 | 2576 |
| F01.PB28332 | F01.PB44446 | 1 | 1481 | 1479 | 2623 | 103 | 1583 | 1855 | 2999 |
| F01.PB35184 | F01.PB22778 | 1 | 1570 | 1566 | 2210 | 17 | 1584 | 1793 | 2437 |
| F01.PB21702 | F01.PB27782 | 1 | 1134 | 1132 | 2273 | 1 | 1133 | 1247 | 2380 |
| F01.PB21245 | F01.PB44446 | 1 | 1514 | 1512 | 2601 | 70 | 1583 | 1855 | 2944 |
| F01.PB20210 | F01.PB35533 | 1 | 1113 | 1113 | 1928 | 1 | 1115 | 1788 | 2602 |
| F01.PB34185 | F01.PB38655 | 1 | 1836 | 1832 | 2975 | 557 | 2396 | 2502 | 3635 |
| F01.PB28348 | F01.PB25322 | 1 | 1769 | 1768 | 2003 | 1 | 1774 | 1874 | 2109 |
| F01.PB21462 | F01.PB34623 | 1 | 1730 | 1729 | 2263 | 1 | 1734 | 2333 | 2867 |
| F01.PB27215 | F01.PB36008 | 1 | 1456 | 1457 | 2673 | 79 | 1534 | 1640 | 2856 |
| F01.PB43173 | F01.PB35806 | 170 | 2247 | 1 | 174 | 478 | 2554 | 89 | 262 |
| F01.PB29234 | F01.PB37598 | 1 | 2299 | 2294 | 2402 | 230 | 2528 | 3300 | 3408 |
| F01.PB26709 | F01.PB25442 | 124 | 1951 | 1 | 123 | 373 | 2201 | 33 | 154 |
| F01.PB30339 | F01.PB32735 | 281 | 2536 | 39 | 282 | 549 | 2806 | 1 | 244 |
| F01.PB32525 | F01.PB31204 | 177 | 2544 | 16 | 176 | 353 | 2716 | 1 | 161 |
| F01.PB27864 | F01.PB32080 | 1 | 1965 | 1963 | 2682 | 34 | 1999 | 2160 | 2879 |
| F01.PB17799 | F01.PB22077 | 498 | 1921 | 8 | 497 | 1255 | 2678 | 13 | 502 |
| F01.PB30131 | F01.PB35436 | 1 | 1402 | 1403 | 2314 | 302 | 1705 | 1849 | 2755 |
| F01.PB42736 | F01.PB28884 | 1 | 1813 | 1810 | 2201 | 156 | 1971 | 2211 | 2603 |
| F01.PB27455 | F01.PB21978 | 133 | 1972 | 1 | 132 | 294 | 2136 | 1 | 132 |
| F01.PB10753 | F01.PB19602 | 343 | 1250 | 6 | 344 | 988 | 1894 | 1 | 340 |
| F01.PB37765 | F01.PB37117 | 24 | 2643 | 2639 | 3400 | 1 | 2620 | 2839 | 3600 |
| F01.PB30601 | F01.PB33942 | 279 | 2236 | 28 | 283 | 814 | 2769 | 1 | 257 |
| F01.PB31650 | F01.PB32657 | 1 | 1668 | 1667 | 2555 | 94 | 1763 | 1863 | 2751 |
| F01.PB26827 | F01.PB33441 | 418 | 2864 | 90 | 420 | 435 | 2884 | 1 | 329 |
| F01.PB36095 | F01.PB25142 | 107 | 2254 | 1 | 104 | 312 | 2459 | 63 | 166 |
| F01.PB19388 | F01.PB44081 | 295 | 1732 | 51 | 297 | 455 | 1890 | 17 | 259 |
| F01.PB20452 | F01.PB34516 | 1 | 1284 | 1282 | 1470 | 1 | 1284 | 2053 | 2241 |
| F01.PB9476 | F01.PB23174 | 1 | 1062 | 1058 | 1471 | 699 | 1766 | 1870 | 2269 |
| F01.PB28263 | F01.PB26988 | 1226 | 2529 | 1 | 1226 | 1400 | 2705 | 31 | 1266 |
| F01.PB27503 | F01.PB25687 | 1164 | 2381 | 1 | 1166 | 1275 | 2492 | 6 | 1171 |
| F01.PB32674 | F01.PB44334 | 232 | 2556 | 2 | 232 | 383 | 2702 | 1 | 232 |
| F01.PB29267 | F01.PB34762 | 1089 | 2509 | 1 | 1091 | 1189 | 2609 | 1 | 1083 |
| F01.PB43084 | F01.PB29039 | 115 | 2070 | 1 | 114 | 491 | 2448 | 172 | 285 |
| F01.PB11206 | F01.PB32807 | 295 | 1570 | 7 | 298 | 1406 | 2683 | 1 | 293 |
| F01.PB42350 | F01.PB30310 | 395 | 2003 | 54 | 396 | 451 | 2059 | 1 | 343 |
| F01.PB18531 | F01.PB42720 | 1 | 1490 | 1488 | 1940 | 5 | 1498 | 1814 | 2266 |
| F01.PB23285 | F01.PB23203 | 1010 | 2220 | 1 | 1006 | 1158 | 2369 | 3 | 1010 |
| F01.PB32165 | F01.PB37982 | 1 | 1494 | 1494 | 2845 | 1 | 1494 | 1688 | 3037 |
| F01.PB36301 | F01.PB45331 | 17 | 1762 | 1760 | 3142 | 1 | 1746 | 1870 | 3248 |
| F01.PB17217 | F01.PB40538 | 8 | 747 | 743 | 1116 | 1 | 740 | 927 | 1301 |
| F01.PB24016 | F01.PB27879 | 1228 | 2499 | 1 | 1229 | 1355 | 2626 | 4 | 1232 |
| F01.PB32877 | F01.PB36822 | 237 | 2717 | 1 | 241 | 523 | 3006 | 50 | 290 |
| F01.PB24727 | F01.PB23745 | 142 | 2262 | 1 | 145 | 586 | 2701 | 16 | 160 |
| F01.PB36117 | F01.PB22979 | 1 | 1920 | 1917 | 2235 | 1 | 1908 | 2028 | 2338 |
| F01.PB25358 | F01.PB43205 | 1 | 1517 | 1516 | 2021 | 6 | 1522 | 1833 | 2338 |
| F01.PB24652 | F01.PB24902 | 1 | 1324 | 1324 | 2022 | 1 | 1320 | 1433 | 2130 |
| F01.PB20865 | F01.PB32609 | 10 | 1765 | 1764 | 2100 | 1 | 1756 | 1907 | 2243 |
| F01.PB15806 | F01.PB23534 | 1 | 1320 | 1318 | 1639 | 68 | 1385 | 1956 | 2277 |
| F01.PB17506 | F01.PB39419 | 508 | 999 | 1 | 512 | 2510 | 2999 | 1007 | 1518 |
| F01.PB12303 | F01.PB18963 | 471 | 988 | 1 | 474 | 728 | 1246 | 1 | 474 |
| F01.PB27997 | F01.PB35914 | 138 | 2085 | 1 | 138 | 387 | 2333 | 1 | 135 |
| F01.PB28593 | F01.PB22393 | 1 | 1900 | 1901 | 2159 | 59 | 1956 | 2132 | 2390 |
| F01.PB20544 | F01.PB40576 | 177 | 1175 | 36 | 179 | 456 | 1455 | 13 | 156 |
| F01.PB31937 | F01.PB21253 | 1 | 1240 | 1238 | 2011 | 6 | 1249 | 1376 | 2149 |
| F01.PB28823 | F01.PB44654 | 686 | 2612 | 69 | 689 | 1025 | 2951 | 14 | 634 |
| F01.PB44616 | F01.PB36068 | 1238 | 2588 | 1 | 1243 | 1580 | 2927 | 85 | 1327 |
| F01.PB26680 | F01.PB23895 | 1 | 1934 | 1933 | 2526 | 2 | 1935 | 2079 | 2671 |
| F01.PB25589 | F01.PB34822 | 239 | 2446 | 1 | 240 | 401 | 2609 | 37 | 276 |
| F01.PB32877 | F01.PB36374 | 237 | 2717 | 1 | 241 | 719 | 3194 | 96 | 336 |
| F01.PB22348 | F01.PB25283 | 178 | 2022 | 1 | 180 | 399 | 2239 | 49 | 235 |
| F01.PB13403 | F01.PB10424 | 357 | 1071 | 36 | 358 | 506 | 1223 | 62 | 405 |
| F01.PB23979 | F01.PB33525 | 1112 | 2490 | 1 | 1111 | 1352 | 2728 | 136 | 1246 |
| F01.PB25188 | F01.PB33579 | 1161 | 2427 | 1 | 1162 | 1503 | 2770 | 80 | 1222 |
| F01.PB29276 | F01.PB27852 | 113 | 2013 | 1 | 112 | 239 | 2138 | 4 | 115 |
| F01.PB24579 | F01.PB38081 | 149 | 2395 | 1 | 151 | 1038 | 3279 | 1 | 150 |
| F01.PB12235 | F01.PB21603 | 511 | 1644 | 72 | 512 | 1233 | 2362 | 1 | 442 |
| F01.PB26018 | F01.PB32701 | 1 | 1657 | 1655 | 2201 | 20 | 1664 | 2041 | 2587 |
| F01.PB37382 | F01.PB37734 | 15 | 2630 | 2630 | 3297 | 16 | 2630 | 2779 | 3444 |
| F01.PB31578 | F01.PB33088 | 21 | 2210 | 2210 | 2871 | 1 | 2192 | 2302 | 2963 |
| F01.PB19752 | F01.PB21897 | 153 | 1615 | 1 | 153 | 527 | 1988 | 9 | 161 |
| F01.PB8865 | F01.PB31998 | 1 | 1066 | 1065 | 1551 | 343 | 1408 | 1549 | 2037 |
| F01.PB11891 | F01.PB21603 | 493 | 1685 | 57 | 494 | 1233 | 2423 | 1 | 442 |
| F01.PB20414 | F01.PB8647 | 1 | 1101 | 1098 | 1489 | 37 | 1139 | 1281 | 1672 |
| F01.PB32165 | F01.PB39340 | 1 | 1948 | 1945 | 2882 | 2 | 1949 | 2194 | 3131 |
| F01.PB10426 | F01.PB20962 | 1 | 1164 | 1161 | 1397 | 32 | 1195 | 2380 | 2614 |
| F01.PB7683 | F01.PB27530 | 104 | 1583 | 1 | 109 | 519 | 1999 | 6 | 114 |
| F01.PB27278 | F01.PB44193 | 103 | 1553 | 1552 | 2746 | 49 | 1499 | 1635 | 2829 |
| F01.PB5846 | F01.PB18431 | 250 | 1220 | 3 | 251 | 545 | 1509 | 36 | 284 |
| F01.PB27505 | F01.PB28229 | 169 | 2171 | 1 | 168 | 306 | 2316 | 4 | 171 |
| F01.PB6030 | F01.PB41278 | 280 | 1285 | 33 | 281 | 400 | 1405 | 1 | 250 |
| F01.PB6529 | F01.PB42368 | 1 | 1029 | 1026 | 1350 | 504 | 1532 | 1795 | 2119 |
| F01.PB45439 | F01.PB37645 | 157 | 3010 | 1 | 161 | 761 | 3613 | 128 | 288 |
| F01.PB38907 | F01.PB36543 | 1 | 2077 | 2073 | 3115 | 111 | 2192 | 2352 | 3406 |
| F01.PB6727 | F01.PB42564 | 105 | 1537 | 1 | 108 | 569 | 2001 | 79 | 186 |
| F01.PB5676 | F01.PB15522 | 278 | 1286 | 41 | 277 | 389 | 1398 | 1 | 237 |
| F01.PB24453 | F01.PB26831 | 322 | 2067 | 45 | 323 | 573 | 2319 | 1 | 279 |
| F01.PB43397 | F01.PB32716 | 1 | 1919 | 1916 | 2290 | 19 | 1937 | 2466 | 2840 |
| F01.PB22005 | F01.PB25224 | 122 | 2104 | 1 | 122 | 478 | 2453 | 2 | 122 |
| F01.PB28286 | F01.PB26863 | 287 | 2111 | 71 | 289 | 526 | 2350 | 46 | 264 |
| F01.PB36133 | F01.PB44137 | 462 | 2099 | 86 | 460 | 784 | 2421 | 1 | 375 |
| F01.PB30698 | F01.PB27617 | 1017 | 2150 | 1 | 1021 | 1218 | 2351 | 1 | 1021 |
| F01.PB14899 | F01.PB27539 | 1 | 1225 | 1223 | 1375 | 23 | 1247 | 1991 | 2143 |
| F01.PB21448 | F01.PB34131 | 202 | 2044 | 12 | 203 | 575 | 2397 | 1 | 192 |
| F01.PB20483 | F01.PB15357 | 262 | 1047 | 27 | 261 | 379 | 1164 | 39 | 273 |
| F01.PB13740 | F01.PB6773 | 1 | 1071 | 1070 | 1303 | 68 | 1138 | 1292 | 1525 |
| F01.PB22997 | F01.PB21912 | 1 | 1300 | 1296 | 2295 | 16 | 1315 | 1644 | 2643 |
| F01.PB12666 | F01.PB9534 | 1 | 1008 | 1006 | 1269 | 84 | 1090 | 1210 | 1484 |
| F01.PB8043 | F01.PB34939 | 224 | 1579 | 30 | 224 | 1289 | 2636 | 1 | 193 |
| F01.PB12243 | F01.PB10057 | 1 | 1196 | 1196 | 1328 | 4 | 1198 | 1311 | 1439 |
| F01.PB32566 | F01.PB26124 | 198 | 2184 | 1 | 200 | 567 | 2555 | 1 | 200 |
| F01.PB21267 | F01.PB34582 | 1 | 1696 | 1694 | 2284 | 1 | 1695 | 1948 | 2539 |
| F01.PB22735 | F01.PB33482 | 117 | 1469 | 1467 | 2634 | 26 | 1375 | 1493 | 2655 |
| F01.PB10300 | F01.PB43688 | 133 | 1372 | 1 | 132 | 751 | 1990 | 1 | 132 |
| F01.PB41848 | F01.PB31407 | 1 | 1378 | 1376 | 1925 | 1 | 1377 | 1480 | 2028 |
| F01.PB10261 | F01.PB7424 | 177 | 1154 | 5 | 178 | 275 | 1250 | 1 | 174 |
| F01.PB30621 | F01.PB29093 | 329 | 2242 | 5 | 332 | 445 | 2354 | 1 | 329 |
| F01.PB35566 | F01.PB34980 | 173 | 2529 | 1 | 175 | 317 | 2672 | 1 | 175 |
| F01.PB31226 | F01.PB31432 | 1 | 2583 | 2584 | 2808 | 25 | 2607 | 2736 | 2960 |
| F01.PB42193 | F01.PB38326 | 249 | 2120 | 7 | 253 | 1187 | 3059 | 10 | 257 |
| F01.PB21190 | F01.PB25460 | 218 | 2388 | 1 | 217 | 570 | 2744 | 50 | 266 |
| F01.PB33374 | F01.PB38096 | 170 | 2930 | 1 | 174 | 866 | 3625 | 1 | 165 |
| F01.PB44371 | F01.PB39449 | 396 | 2924 | 92 | 396 | 592 | 3112 | 1 | 305 |
| F01.PB11991 | F01.PB43429 | 118 | 1398 | 1 | 118 | 881 | 2164 | 1 | 118 |
| F01.PB15805 | F01.PB14255 | 1 | 1069 | 1064 | 1494 | 19 | 1089 | 1313 | 1743 |
| F01.PB43145 | F01.PB27501 | 1 | 1240 | 1238 | 2034 | 1 | 1240 | 1387 | 2187 |
| F01.PB44407 | F01.PB39446 | 1010 | 2917 | 1 | 1009 | 1151 | 3058 | 8 | 1016 |
| F01.PB22154 | F01.PB44548 | 1158 | 2423 | 1 | 1157 | 1474 | 2739 | 1 | 1157 |
| F01.PB16939 | F01.PB33296 | 179 | 1988 | 1 | 182 | 949 | 2754 | 7 | 196 |
| F01.PB11991 | F01.PB23425 | 118 | 1398 | 1 | 117 | 826 | 2093 | 51 | 157 |
| F01.PB23301 | F01.PB22940 | 1 | 1725 | 1724 | 2376 | 77 | 1802 | 1903 | 2555 |
| F01.PB20599 | F01.PB21718 | 1 | 1171 | 1170 | 1381 | 1 | 1170 | 1868 | 2079 |
| F01.PB45358 | F01.PB39302 | 1 | 1715 | 1715 | 3031 | 580 | 2293 | 2395 | 3711 |
| F01.PB32489 | F01.PB45955 | 340 | 2690 | 62 | 340 | 506 | 2856 | 1 | 279 |
| F01.PB31653 | F01.PB39712 | 1 | 2215 | 2210 | 2631 | 362 | 2576 | 3266 | 3687 |
| F01.PB26055 | F01.PB37528 | 1 | 1515 | 1510 | 2268 | 1182 | 2697 | 2881 | 3644 |
| F01.PB37621 | F01.PB45390 | 553 | 3043 | 60 | 556 | 679 | 3169 | 1 | 497 |
| F01.PB29578 | F01.PB37970 | 1 | 1537 | 1535 | 2181 | 240 | 1771 | 2411 | 3057 |
| F01.PB45968 | F01.PB38960 | 222 | 3044 | 1 | 223 | 443 | 3265 | 94 | 317 |
| F01.PB5097 | F01.PB5692 | 193 | 1293 | 31 | 195 | 351 | 1452 | 31 | 195 |
| F01.PB26897 | F01.PB28686 | 206 | 2243 | 1 | 210 | 491 | 2527 | 1 | 210 |
| F01.PB21385 | F01.PB43292 | 1 | 2085 | 2085 | 2439 | 1 | 2085 | 2188 | 2543 |
| F01.PB10512 | F01.PB29263 | 182 | 1061 | 4 | 185 | 1030 | 1908 | 622 | 802 |
| F01.PB34523 | F01.PB34589 | 250 | 2508 | 1 | 250 | 412 | 2670 | 4 | 252 |
| F01.PB30771 | F01.PB28163 | 1067 | 2235 | 1 | 1067 | 1514 | 2682 | 1 | 1067 |
| F01.PB7063 | F01.PB41131 | 9 | 854 | 851 | 1045 | 1 | 847 | 1157 | 1349 |
| F01.PB41751 | F01.PB44054 | 618 | 1904 | 8 | 618 | 1075 | 2361 | 1 | 611 |
| F01.PB44136 | F01.PB43025 | 25 | 2565 | 2564 | 2720 | 1 | 2541 | 2661 | 2817 |
| F01.PB43173 | F01.PB24452 | 170 | 2309 | 1 | 174 | 437 | 2576 | 48 | 221 |
| F01.PB22289 | F01.PB35326 | 1205 | 2528 | 1 | 1210 | 1332 | 2672 | 1 | 1212 |
| F01.PB44625 | F01.PB36704 | 222 | 2785 | 2 | 221 | 423 | 2986 | 22 | 241 |
| F01.PB15902 | F01.PB15757 | 1 | 1236 | 1237 | 1362 | 1 | 1237 | 1404 | 1529 |
| F01.PB6874 | F01.PB23125 | 1 | 1034 | 1034 | 1320 | 861 | 1895 | 2004 | 2289 |
| F01.PB23442 | F01.PB35580 | 1 | 1693 | 1692 | 2209 | 2 | 1702 | 2151 | 2673 |
| F01.PB30051 | F01.PB34231 | 1 | 1265 | 1261 | 2103 | 74 | 1331 | 1671 | 2515 |
| F01.PB43147 | F01.PB24996 | 435 | 2122 | 59 | 435 | 735 | 2422 | 1 | 387 |
| F01.PB43545 | F01.PB28716 | 1 | 1707 | 1702 | 2165 | 104 | 1810 | 1946 | 2409 |
| F01.PB4816 | F01.PB6708 | 1 | 807 | 804 | 997 | 1 | 807 | 914 | 1107 |
| F01.PB42736 | F01.PB23665 | 1 | 1813 | 1810 | 2201 | 187 | 1999 | 2239 | 2630 |
| F01.PB19748 | F01.PB24842 | 1 | 1383 | 1379 | 1821 | 1 | 1383 | 1795 | 2238 |
| F01.PB36201 | F01.PB33708 | 296 | 2263 | 78 | 299 | 948 | 2914 | 86 | 308 |
| F01.PB23919 | F01.PB22910 | 18 | 1920 | 1919 | 2168 | 1 | 1894 | 2006 | 2255 |
| F01.PB16609 | F01.PB18241 | 115 | 1010 | 4 | 115 | 314 | 1208 | 1 | 112 |
| F01.PB43235 | F01.PB44530 | 104 | 1990 | 1 | 104 | 1158 | 3044 | 950 | 1053 |
| F01.PB27941 | F01.PB33919 | 1 | 1644 | 1645 | 2509 | 24 | 1664 | 2027 | 2890 |
| F01.PB15699 | F01.PB15921 | 177 | 1206 | 45 | 175 | 244 | 1274 | 1 | 130 |
| F01.PB36360 | F01.PB38085 | 220 | 3536 | 1 | 219 | 430 | 3741 | 1 | 217 |
| F01.PB34501 | F01.PB33645 | 114 | 2455 | 1 | 114 | 472 | 2814 | 152 | 267 |
| F01.PB30845 | F01.PB42568 | 1 | 1543 | 1542 | 2216 | 35 | 1577 | 1780 | 2457 |
| F01.PB27494 | F01.PB26813 | 139 | 1973 | 1 | 140 | 842 | 2674 | 374 | 513 |
| F01.PB6374 | F01.PB43621 | 220 | 1619 | 5 | 222 | 671 | 2070 | 1 | 218 |
| F01.PB23308 | F01.PB43304 | 1 | 1532 | 1530 | 2084 | 73 | 1604 | 1871 | 2428 |
| F01.PB29977 | F01.PB42385 | 231 | 2459 | 1 | 231 | 382 | 2611 | 1 | 231 |
| F01.PB22422 | F01.PB38978 | 1 | 1494 | 1491 | 2220 | 830 | 2323 | 2435 | 3164 |
| F01.PB23126 | F01.PB30832 | 149 | 2158 | 1 | 148 | 405 | 2406 | 1 | 148 |
| F01.PB20639 | F01.PB34516 | 1 | 1265 | 1263 | 1473 | 20 | 1284 | 2053 | 2263 |
| F01.PB27418 | F01.PB21842 | 604 | 2526 | 61 | 606 | 841 | 2766 | 83 | 630 |
| F01.PB44708 | F01.PB38746 | 1 | 2216 | 2216 | 2736 | 840 | 3053 | 3198 | 3720 |
| F01.PB20238 | F01.PB44437 | 260 | 1883 | 6 | 258 | 1044 | 2667 | 1 | 253 |
| F01.PB32672 | F01.PB44446 | 1 | 1454 | 1452 | 2596 | 130 | 1583 | 1855 | 2999 |
| F01.PB23854 | F01.PB32910 | 183 | 2601 | 1 | 187 | 382 | 2798 | 79 | 264 |
| F01.PB40339 | F01.PB32295 | 195 | 1279 | 4 | 196 | 302 | 1386 | 5 | 196 |
| F01.PB39254 | F01.PB39701 | 1 | 2830 | 2825 | 3009 | 119 | 2949 | 3381 | 3565 |
| F01.PB5213 | F01.PB19989 | 1 | 1319 | 1319 | 1596 | 93 | 1411 | 1716 | 1993 |
| F01.PB20738 | F01.PB28423 | 262 | 2173 | 43 | 258 | 567 | 2470 | 1 | 216 |
| F01.PB17181 | F01.PB33955 | 202 | 1216 | 35 | 203 | 1789 | 2803 | 1 | 169 |
| F01.PB33524 | F01.PB30815 | 191 | 2625 | 1 | 193 | 344 | 2779 | 43 | 235 |
| F01.PB35121 | F01.PB45330 | 226 | 2877 | 1 | 225 | 931 | 3573 | 603 | 826 |
| F01.PB27494 | F01.PB33347 | 139 | 2039 | 1 | 140 | 841 | 2754 | 374 | 513 |
| F01.PB10426 | F01.PB32399 | 1 | 1164 | 1161 | 1398 | 1 | 1165 | 2350 | 2585 |
| F01.PB22338 | F01.PB44165 | 1 | 1255 | 1255 | 2255 | 6 | 1260 | 1486 | 2486 |
| F01.PB34603 | F01.PB39239 | 1 | 2349 | 2348 | 2566 | 46 | 2394 | 2502 | 2720 |
| F01.PB26572 | F01.PB24833 | 171 | 2075 | 11 | 170 | 263 | 2158 | 1 | 160 |
| F01.PB41042 | F01.PB45521 | 553 | 1457 | 7 | 552 | 2006 | 2910 | 55 | 600 |
| F01.PB27550 | F01.PB32796 | 1668 | 1 | 2444 | 1670 | 912 | 2577 | 36 | 810 |
| F01.PB25560 | F01.PB44397 | 599 | 2601 | 9 | 603 | 703 | 2700 | 3 | 601 |
| F01.PB25986 | F01.PB30767 | 112 | 2262 | 1 | 113 | 374 | 2526 | 2 | 116 |
| F01.PB13782 | F01.PB29205 | 139 | 1587 | 1 | 142 | 1038 | 2481 | 1 | 143 |
| F01.PB28585 | F01.PB31663 | 196 | 2795 | 1 | 198 | 325 | 2924 | 1 | 197 |
| F01.PB25032 | F01.PB29121 | 1 | 1666 | 1668 | 1985 | 38 | 1708 | 1851 | 2159 |
| F01.PB21239 | F01.PB44419 | 241 | 2232 | 57 | 242 | 662 | 2653 | 37 | 222 |
| F01.PB13060 | F01.PB42710 | 1 | 1274 | 1275 | 1478 | 244 | 1516 | 1914 | 2117 |
| F01.PB21723 | F01.PB23905 | 329 | 2375 | 6 | 329 | 500 | 2578 | 1 | 324 |
| F01.PB23738 | F01.PB29178 | 1 | 1086 | 1084 | 2170 | 2 | 1106 | 1281 | 2371 |
| F01.PB21938 | F01.PB37775 | 128 | 2684 | 1 | 130 | 479 | 3038 | 54 | 185 |
| F01.PB28657 | F01.PB27877 | 121 | 2321 | 1 | 123 | 292 | 2492 | 51 | 172 |
| F01.PB28823 | F01.PB35218 | 639 | 2590 | 69 | 643 | 711 | 2668 | 14 | 588 |
| F01.PB41134 | F01.PB23247 | 10 | 1117 | 1117 | 1413 | 5 | 1111 | 1706 | 2002 |
| F01.PB20728 | F01.PB28423 | 270 | 2191 | 51 | 266 | 567 | 2488 | 1 | 216 |
| F01.PB35608 | F01.PB38670 | 22 | 2464 | 2462 | 2774 | 1 | 2444 | 2895 | 3208 |
| F01.PB33158 | F01.PB32053 | 11 | 1755 | 1754 | 2504 | 161 | 1905 | 2007 | 2756 |
| F01.PB9476 | F01.PB41944 | 1 | 1062 | 1058 | 1468 | 346 | 1408 | 1512 | 1913 |
| F01.PB15753 | F01.PB17189 | 1 | 1300 | 1297 | 1500 | 26 | 1329 | 1572 | 1773 |
| F01.PB21893 | F01.PB25539 | 587 | 2291 | 74 | 587 | 878 | 2588 | 113 | 627 |
| F01.PB10650 | F01.PB26381 | 1 | 1184 | 1182 | 1521 | 241 | 1425 | 1840 | 2179 |
| F01.PB33068 | F01.PB29131 | 1 | 1710 | 1708 | 2395 | 42 | 1751 | 2001 | 2677 |
| F01.PB24988 | F01.PB44539 | 1 | 1411 | 1410 | 2180 | 198 | 1609 | 2151 | 2922 |
| F01.PB33770 | F01.PB34283 | 131 | 2370 | 1 | 133 | 327 | 2586 | 1 | 133 |
| F01.PB42649 | F01.PB43153 | 10 | 1151 | 1149 | 2037 | 1 | 1145 | 1646 | 2525 |
| F01.PB17374 | F01.PB29087 | 103 | 1996 | 1 | 103 | 341 | 2231 | 42 | 144 |
| F01.PB44625 | F01.PB34714 | 222 | 2785 | 2 | 221 | 423 | 2987 | 22 | 241 |
| F01.PB25188 | F01.PB44450 | 1161 | 2441 | 1 | 1164 | 1669 | 2950 | 77 | 1221 |
| F01.PB35681 | F01.PB24689 | 337 | 2257 | 38 | 339 | 476 | 2397 | 5 | 299 |
| F01.PB10438 | F01.PB32976 | 130 | 1592 | 1 | 127 | 1022 | 2480 | 27 | 154 |
| F01.PB24178 | F01.PB22619 | 1 | 1655 | 1653 | 2034 | 30 | 1679 | 1799 | 2178 |
| F01.PB23391 | F01.PB30495 | 1 | 1793 | 1789 | 2171 | 1 | 1791 | 1930 | 2313 |
| F01.PB12430 | F01.PB31357 | 406 | 1479 | 42 | 407 | 1185 | 2257 | 403 | 768 |
| F01.PB32212 | F01.PB38426 | 268 | 2757 | 1 | 269 | 867 | 3356 | 17 | 285 |
| F01.PB22192 | F01.PB21688 | 14 | 1781 | 1780 | 2137 | 43 | 1810 | 1924 | 2281 |
| F01.PB39129 | F01.PB38147 | 2788 | 995 | 1036 | 2788 | 297 | 2087 | 2085 | 3834 |
| F01.PB18112 | F01.PB26540 | 173 | 1748 | 1 | 172 | 573 | 2148 | 7 | 175 |
| F01.PB17475 | F01.PB42875 | 1 | 1185 | 1184 | 1945 | 3 | 1187 | 1294 | 2055 |
| F01.PB44368 | F01.PB34685 | 185 | 2489 | 16 | 186 | 337 | 2659 | 24 | 194 |
| F01.PB30835 | F01.PB32053 | 1 | 1889 | 1888 | 2638 | 15 | 1905 | 2007 | 2756 |
| F01.PB42475 | F01.PB20998 | 1 | 1764 | 1764 | 2134 | 30 | 1795 | 1898 | 2270 |
| F01.PB14444 | F01.PB24712 | 113 | 1449 | 1 | 115 | 695 | 2031 | 103 | 217 |
| F01.PB36699 | F01.PB36920 | 529 | 3355 | 58 | 529 | 821 | 3650 | 5 | 476 |
| F01.PB43813 | F01.PB37053 | 1 | 2277 | 2278 | 2974 | 81 | 2346 | 2729 | 3425 |
| F01.PB30585 | F01.PB43200 | 548 | 2181 | 7 | 551 | 732 | 2369 | 1 | 545 |
| F01.PB16091 | F01.PB25442 | 152 | 1980 | 1 | 151 | 373 | 2201 | 4 | 154 |
| F01.PB22348 | F01.PB25619 | 178 | 2034 | 1 | 180 | 364 | 2216 | 14 | 200 |
| F01.PB10426 | F01.PB35612 | 1 | 1164 | 1161 | 1373 | 3 | 1166 | 2354 | 2566 |
| F01.PB39648 | F01.PB37435 | 1 | 2348 | 2347 | 3212 | 1 | 2349 | 2466 | 3331 |
| F01.PB45820 | F01.PB45446 | 3 | 3181 | 3179 | 3579 | 1 | 3179 | 3395 | 3795 |
| F01.PB18556 | F01.PB32701 | 1 | 1644 | 1642 | 1921 | 20 | 1664 | 2041 | 2320 |
| F01.PB16148 | F01.PB31998 | 1 | 1409 | 1408 | 1895 | 1 | 1408 | 1549 | 2037 |
| F01.PB14444 | F01.PB28244 | 116 | 1449 | 1 | 115 | 677 | 1997 | 84 | 198 |
| F01.PB36496 | F01.PB38744 | 1377 | 3198 | 1 | 1377 | 1745 | 3556 | 55 | 1428 |
| F01.PB28219 | F01.PB26691 | 1 | 1593 | 1591 | 2349 | 1 | 1593 | 1705 | 2466 |
| F01.PB43202 | F01.PB21176 | 1 | 1702 | 1697 | 2061 | 24 | 1725 | 1910 | 2275 |
| F01.PB36394 | F01.PB37117 | 181 | 2800 | 2796 | 3557 | 1 | 2620 | 2839 | 3600 |
| F01.PB29199 | F01.PB36178 | 503 | 2013 | 72 | 503 | 622 | 2132 | 1 | 431 |
| F01.PB21229 | F01.PB25142 | 102 | 2229 | 1 | 104 | 331 | 2459 | 63 | 166 |
| F01.PB20737 | F01.PB29150 | 132 | 2401 | 1 | 134 | 325 | 2576 | 1 | 133 |
| F01.PB33158 | F01.PB33207 | 11 | 1424 | 1423 | 2504 | 111 | 1524 | 1666 | 2747 |
| F01.PB42395 | F01.PB35311 | 1 | 1767 | 1766 | 2615 | 6 | 1773 | 1883 | 2732 |
| F01.PB10300 | F01.PB27455 | 133 | 1372 | 1 | 133 | 733 | 1972 | 1 | 133 |
| F01.PB28322 | F01.PB22963 | 385 | 2505 | 52 | 386 | 478 | 2598 | 40 | 374 |
| F01.PB19840 | F01.PB25120 | 1 | 1031 | 1029 | 1783 | 1 | 1031 | 1805 | 2558 |
| F01.PB21378 | F01.PB27302 | 110 | 2015 | 1 | 110 | 294 | 2201 | 7 | 116 |
| F01.PB20925 | F01.PB21779 | 695 | 2493 | 98 | 697 | 744 | 2542 | 1 | 605 |
| F01.PB29967 | F01.PB39457 | 399 | 2440 | 70 | 399 | 1394 | 3430 | 741 | 1065 |
| F01.PB13260 | F01.PB28970 | 293 | 993 | 2 | 296 | 1637 | 2349 | 2 | 296 |
| F01.PB27494 | F01.PB35214 | 139 | 2038 | 1 | 140 | 843 | 2740 | 376 | 515 |
| F01.PB23295 | F01.PB25442 | 210 | 2040 | 59 | 209 | 373 | 2201 | 1 | 154 |
| F01.PB12311 | F01.PB19093 | 1 | 1100 | 1098 | 1419 | 42 | 1141 | 1591 | 1912 |
| F01.PB30596 | F01.PB27722 | 1 | 1612 | 1610 | 1994 | 41 | 1654 | 2016 | 2400 |
| F01.PB28332 | F01.PB34931 | 1 | 2154 | 2154 | 2567 | 41 | 2198 | 2304 | 2717 |
| F01.PB23051 | F01.PB33177 | 1049 | 2816 | 1 | 1051 | 1201 | 2967 | 8 | 1058 |
| F01.PB32377 | F01.PB23650 | 182 | 2228 | 10 | 184 | 291 | 2337 | 1 | 178 |
| F01.PB26929 | F01.PB21897 | 161 | 1635 | 1 | 161 | 527 | 1994 | 1 | 161 |
| F01.PB35769 | F01.PB34825 | 130 | 2699 | 1 | 129 | 297 | 2867 | 52 | 180 |
| F01.PB25017 | F01.PB32609 | 1 | 1752 | 1749 | 2186 | 5 | 1756 | 2306 | 2743 |
| F01.PB18250 | F01.PB5163 | 157 | 1201 | 3 | 161 | 368 | 1418 | 43 | 204 |
| F01.PB38587 | F01.PB45446 | 2381 | 1 | 2908 | 2385 | 762 | 3141 | 1 | 522 |
| F01.PB25864 | F01.PB25273 | 1 | 1745 | 1742 | 2046 | 90 | 1830 | 2010 | 2314 |
| F01.PB43084 | F01.PB24418 | 115 | 2089 | 1 | 114 | 320 | 2294 | 1 | 114 |
| F01.PB35121 | F01.PB36353 | 226 | 2877 | 1 | 225 | 794 | 3435 | 466 | 689 |
| F01.PB8331 | F01.PB31117 | 1 | 1114 | 1115 | 1455 | 1053 | 2170 | 2270 | 2612 |
| F01.PB28218 | F01.PB30858 | 418 | 2190 | 71 | 420 | 910 | 2680 | 208 | 557 |
| F01.PB22371 | F01.PB33661 | 1 | 1676 | 1676 | 2405 | 240 | 1913 | 2073 | 2801 |
| F01.PB25127 | F01.PB23847 | 188 | 2022 | 14 | 188 | 327 | 2160 | 38 | 226 |
| F01.PB27864 | F01.PB33154 | 225 | 2696 | 1 | 225 | 379 | 2850 | 34 | 258 |
| F01.PB17419 | F01.PB24287 | 15 | 1588 | 1585 | 1966 | 52 | 1626 | 1837 | 2218 |
| F01.PB39605 | F01.PB36964 | 755 | 3378 | 8 | 754 | 1009 | 3631 | 1 | 747 |
| F01.PB27296 | F01.PB31204 | 157 | 2526 | 1 | 156 | 353 | 2716 | 6 | 161 |
| F01.PB39727 | F01.PB38085 | 220 | 3482 | 1 | 219 | 431 | 3689 | 1 | 218 |
| F01.PB40262 | F01.PB10734 | 124 | 1464 | 1 | 125 | 290 | 1643 | 13 | 147 |
| F01.PB33048 | F01.PB39555 | 1 | 1411 | 1412 | 2704 | 233 | 1652 | 1836 | 3128 |
| F01.PB30843 | F01.PB38725 | 1237 | 2936 | 10 | 1241 | 1321 | 3019 | 1 | 1212 |
| F01.PB29903 | F01.PB27507 | 111 | 2202 | 1 | 111 | 286 | 2377 | 42 | 152 |
| F01.PB25405 | F01.PB33274 | 406 | 2523 | 46 | 410 | 596 | 2710 | 23 | 409 |
| F01.PB31343 | F01.PB38332 | 1 | 1675 | 1675 | 2766 | 23 | 1697 | 1930 | 3021 |
| F01.PB35958 | F01.PB27877 | 194 | 2378 | 19 | 189 | 307 | 2492 | 1 | 171 |
| F01.PB14590 | F01.PB10987 | 342 | 1301 | 4 | 347 | 540 | 1498 | 24 | 367 |
| F01.PB35296 | F01.PB22852 | 1 | 1472 | 1470 | 2445 | 30 | 1501 | 1647 | 2635 |
| F01.PB41839 | F01.PB25063 | 428 | 1937 | 51 | 429 | 686 | 2195 | 1 | 379 |
| F01.PB25064 | F01.PB33170 | 1 | 2511 | 2510 | 2616 | 3 | 2511 | 2636 | 2742 |
| F01.PB26337 | F01.PB44709 | 1211 | 2500 | 12 | 1210 | 1319 | 2613 | 1 | 1205 |
| F01.PB43545 | F01.PB28939 | 1 | 1707 | 1702 | 2166 | 1 | 1707 | 1909 | 2373 |
| F01.PB35331 | F01.PB45600 | 1404 | 2899 | 1 | 1404 | 1525 | 3020 | 2 | 1403 |
| F01.PB16163 | F01.PB22022 | 1 | 1112 | 1112 | 1998 | 2 | 1113 | 1768 | 2652 |
| F01.PB27301 | F01.PB25322 | 1 | 1774 | 1773 | 2009 | 1 | 1774 | 1874 | 2109 |
| F01.PB33804 | F01.PB38411 | 110 | 2700 | 1 | 110 | 397 | 2994 | 1 | 107 |
| F01.PB25038 | F01.PB33229 | 1 | 1052 | 1052 | 2085 | 7 | 1058 | 1715 | 2748 |
| F01.PB20826 | F01.PB28423 | 223 | 2146 | 4 | 219 | 567 | 2488 | 1 | 216 |
| F01.PB35580 | F01.PB44193 | 10 | 1502 | 1501 | 2695 | 7 | 1499 | 1635 | 2829 |
| F01.PB6058 | F01.PB42710 | 1 | 1494 | 1495 | 1680 | 23 | 1516 | 1914 | 2099 |
| F01.PB29903 | F01.PB21777 | 111 | 2197 | 1 | 111 | 351 | 2437 | 107 | 217 |
| F01.PB26202 | F01.PB29290 | 202 | 2131 | 1 | 202 | 494 | 2419 | 29 | 230 |
| F01.PB13160 | F01.PB40719 | 435 | 996 | 1 | 434 | 547 | 1109 | 13 | 446 |
| F01.PB11754 | F01.PB10541 | 342 | 1178 | 9 | 342 | 486 | 1322 | 1 | 334 |
| F01.PB43015 | F01.PB36228 | 1 | 1760 | 1757 | 2733 | 35 | 1794 | 2332 | 3308 |
| F01.PB36696 | F01.PB38655 | 1 | 2395 | 2391 | 3575 | 1 | 2396 | 2502 | 3686 |
| F01.PB39041 | F01.PB36844 | 1 | 2637 | 2636 | 3709 | 214 | 2845 | 2962 | 4036 |
| F01.PB27215 | F01.PB21055 | 14 | 1456 | 1457 | 2673 | 1 | 1443 | 1549 | 2765 |
| F01.PB34018 | F01.PB25336 | 151 | 2488 | 1 | 150 | 373 | 2707 | 31 | 180 |
| F01.PB23747 | F01.PB33332 | 215 | 2816 | 11 | 214 | 344 | 2945 | 1 | 204 |
| F01.PB27866 | F01.PB34198 | 1 | 1613 | 1612 | 2452 | 77 | 1682 | 1796 | 2636 |
| F01.PB35018 | F01.PB30055 | 1 | 1451 | 1449 | 2202 | 2 | 1451 | 1621 | 2373 |
| F01.PB10300 | F01.PB31380 | 133 | 1402 | 1 | 135 | 1332 | 2591 | 1 | 135 |
| F01.PB28114 | F01.PB35510 | 1 | 1681 | 1676 | 2498 | 10 | 1693 | 2054 | 2877 |
| F01.PB19414 | F01.PB32022 | 237 | 1977 | 25 | 239 | 909 | 2647 | 40 | 254 |
| F01.PB18689 | F01.PB23471 | 186 | 2011 | 13 | 185 | 613 | 2435 | 91 | 265 |
| F01.PB26132 | F01.PB30782 | 158 | 2060 | 1 | 159 | 346 | 2252 | 79 | 231 |
| F01.PB24381 | F01.PB23474 | 1 | 1832 | 1831 | 2069 | 1 | 1832 | 1933 | 2171 |
| F01.PB35988 | F01.PB34825 | 110 | 2723 | 1 | 109 | 297 | 2909 | 72 | 180 |
| F01.PB26055 | F01.PB37488 | 1 | 1515 | 1510 | 2193 | 794 | 2310 | 2493 | 3181 |
| F01.PB22056 | F01.PB39494 | 1007 | 2331 | 1 | 1007 | 1663 | 2987 | 15 | 1024 |
| F01.PB34789 | F01.PB34761 | 1025 | 2855 | 1 | 1027 | 1218 | 3024 | 40 | 1066 |
| F01.PB26337 | F01.PB31478 | 1211 | 2461 | 12 | 1210 | 1303 | 2558 | 1 | 1203 |
| F01.PB42308 | F01.PB38262 | 1 | 1329 | 1330 | 2692 | 1 | 1329 | 1647 | 3004 |
| F01.PB33804 | F01.PB36536 | 110 | 2697 | 1 | 110 | 449 | 3030 | 53 | 159 |
| F01.PB20130 | F01.PB31998 | 1 | 1407 | 1406 | 1891 | 2 | 1408 | 1549 | 2037 |
| F01.PB33123 | F01.PB33441 | 379 | 2825 | 55 | 381 | 435 | 2863 | 1 | 329 |
| F01.PB13246 | F01.PB16862 | 185 | 1081 | 41 | 184 | 285 | 1179 | 41 | 184 |
| F01.PB24685 | F01.PB21920 | 99 | 2141 | 1 | 100 | 624 | 2669 | 301 | 398 |
| F01.PB19070 | F01.PB21057 | 14 | 1419 | 1420 | 1933 | 1 | 1406 | 1658 | 2171 |
| F01.PB23558 | F01.PB38093 | 1 | 1849 | 1850 | 2466 | 214 | 2069 | 2332 | 2961 |
| F01.PB10567 | F01.PB26468 | 169 | 1011 | 20 | 172 | 1059 | 1901 | 1 | 152 |
| F01.PB31173 | F01.PB33385 | 1 | 2173 | 2172 | 2729 | 1 | 2160 | 2508 | 3065 |
| F01.PB43095 | F01.PB32384 | 753 | 2416 | 82 | 752 | 1119 | 2771 | 1 | 671 |
| F01.PB25188 | F01.PB33084 | 1163 | 2441 | 1 | 1162 | 1424 | 2703 | 108 | 1250 |
| F01.PB22487 | F01.PB25840 | 203 | 2031 | 1 | 202 | 527 | 2356 | 1 | 202 |
| F01.PB24085 | F01.PB35025 | 1 | 1894 | 1894 | 2237 | 46 | 1944 | 2158 | 2501 |
| F01.PB34114 | F01.PB31904 | 109 | 2547 | 1 | 110 | 288 | 2726 | 18 | 127 |
| F01.PB40680 | F01.PB29301 | 267 | 1453 | 4 | 268 | 765 | 1952 | 387 | 651 |
| F01.PB22818 | F01.PB44657 | 1 | 2090 | 2087 | 2432 | 1 | 2095 | 2199 | 2544 |
| F01.PB38587 | F01.PB45820 | 2381 | 1 | 2910 | 2382 | 764 | 3143 | 1 | 527 |
| F01.PB45861 | F01.PB39677 | 3 | 3116 | 3112 | 3536 | 1 | 3114 | 3215 | 3639 |
| F01.PB32336 | F01.PB25653 | 1 | 1359 | 1355 | 2449 | 3 | 1361 | 1467 | 2560 |
| F01.PB31517 | F01.PB26339 | 1 | 1978 | 1974 | 2670 | 1 | 1971 | 2110 | 2809 |
| F01.PB36707 | F01.PB38751 | 913 | 2659 | 2659 | 1017 | 1974 | 3716 | 323 | 1963 |
| F01.PB25720 | F01.PB24629 | 270 | 2077 | 69 | 272 | 385 | 2193 | 1 | 204 |
| F01.PB23378 | F01.PB44548 | 1 | 1157 | 1158 | 2423 | 1 | 1157 | 1474 | 2739 |
| F01.PB27949 | F01.PB31646 | 195 | 2141 | 1 | 199 | 748 | 2694 | 118 | 315 |
| F01.PB19540 | F01.PB32059 | 1 | 1372 | 1368 | 1942 | 33 | 1404 | 1572 | 2155 |
| F01.PB33462 | F01.PB45739 | 174 | 2783 | 1 | 176 | 586 | 3216 | 104 | 279 |
| F01.PB33191 | F01.PB39712 | 181 | 2993 | 1 | 183 | 869 | 3681 | 28 | 211 |
| F01.PB24435 | F01.PB36829 | 140 | 2742 | 1 | 144 | 1259 | 3861 | 1 | 144 |
| F01.PB28947 | F01.PB33494 | 105 | 2081 | 2079 | 2899 | 1 | 1977 | 2101 | 2919 |
| F01.PB12582 | F01.PB32800 | 1 | 1282 | 1279 | 1648 | 1 | 1281 | 2181 | 2550 |
| F01.PB25899 | F01.PB29535 | 485 | 1979 | 7 | 486 | 675 | 2170 | 1 | 480 |
| F01.PB31599 | F01.PB37899 | 1 | 2383 | 2383 | 2863 | 24 | 2404 | 2622 | 3103 |
| F01.PB28818 | F01.PB27459 | 146 | 2124 | 1 | 149 | 570 | 2551 | 218 | 367 |
| F01.PB34554 | F01.PB33186 | 238 | 2637 | 1 | 239 | 425 | 2822 | 39 | 274 |
| F01.PB29320 | F01.PB26124 | 167 | 2149 | 1 | 169 | 567 | 2552 | 32 | 200 |
| F01.PB27038 | F01.PB28527 | 220 | 2104 | 44 | 219 | 481 | 2356 | 184 | 359 |
| F01.PB30963 | F01.PB31377 | 170 | 2774 | 1 | 172 | 298 | 2902 | 1 | 172 |
| F01.PB29358 | F01.PB26505 | 12 | 1571 | 1570 | 2062 | 3 | 1561 | 1670 | 2160 |
| F01.PB42766 | F01.PB43917 | 1 | 1463 | 1461 | 2241 | 1 | 1463 | 1618 | 2398 |
| F01.PB21412 | F01.PB44513 | 1 | 1224 | 1221 | 2310 | 2 | 1225 | 1333 | 2422 |
| F01.PB35861 | F01.PB44381 | 1016 | 2698 | 1 | 1015 | 1197 | 2879 | 76 | 1090 |
| F01.PB21245 | F01.PB34931 | 1 | 2187 | 2187 | 2600 | 8 | 2198 | 2304 | 2717 |
| F01.PB44815 | F01.PB43714 | 13 | 1732 | 1730 | 2316 | 73 | 1792 | 2079 | 2665 |
| F01.PB34328 | F01.PB36008 | 1 | 1344 | 1343 | 2557 | 193 | 1536 | 1643 | 2857 |
| F01.PB37547 | F01.PB39706 | 1 | 1910 | 1914 | 3482 | 108 | 2017 | 2148 | 3716 |
| F01.PB35792 | F01.PB30055 | 1 | 1451 | 1449 | 2201 | 2 | 1451 | 1621 | 2373 |
| F01.PB36194 | F01.PB33942 | 210 | 2227 | 16 | 214 | 814 | 2828 | 59 | 257 |
| F01.PB12136 | F01.PB28631 | 171 | 1696 | 7 | 170 | 717 | 2243 | 1 | 164 |
| F01.PB29896 | F01.PB32735 | 244 | 2684 | 1 | 245 | 368 | 2807 | 1 | 244 |
| F01.PB8883 | F01.PB19543 | 1 | 1008 | 1005 | 1699 | 2 | 1007 | 1171 | 1867 |
| F01.PB34671 | F01.PB33936 | 178 | 2735 | 1 | 178 | 317 | 2874 | 26 | 205 |
| F01.PB12623 | F01.PB37082 | 5 | 653 | 650 | 996 | 23 | 671 | 2731 | 3079 |
| F01.PB30162 | F01.PB21582 | 1 | 1514 | 1514 | 2064 | 122 | 1635 | 1745 | 2296 |
| F01.PB19358 | F01.PB24531 | 169 | 1943 | 1 | 170 | 375 | 2153 | 7 | 184 |
| F01.PB31524 | F01.PB34668 | 1 | 2573 | 2572 | 2712 | 1 | 2574 | 2699 | 2837 |
| F01.PB44275 | F01.PB24523 | 229 | 2452 | 1 | 229 | 383 | 2606 | 3 | 231 |
| F01.PB22075 | F01.PB38081 | 150 | 2308 | 1 | 152 | 1038 | 3194 | 1 | 150 |
| F01.PB44725 | F01.PB36506 | 1 | 2167 | 2166 | 2975 | 167 | 2333 | 2565 | 3374 |
| F01.PB40483 | F01.PB25349 | 1 | 1170 | 1169 | 1581 | 2 | 1169 | 1440 | 1852 |
| F01.PB22162 | F01.PB43251 | 281 | 2174 | 3 | 280 | 378 | 2271 | 1 | 278 |
| F01.PB19046 | F01.PB25442 | 205 | 1995 | 51 | 204 | 373 | 2163 | 1 | 154 |
| F01.PB25188 | F01.PB21999 | 1 | 1306 | 1305 | 2433 | 80 | 1365 | 1490 | 2620 |
| F01.PB26704 | F01.PB32749 | 245 | 2231 | 34 | 248 | 768 | 2738 | 45 | 259 |
| F01.PB22367 | F01.PB32889 | 1124 | 2445 | 1 | 1126 | 1469 | 2795 | 86 | 1211 |
| F01.PB19461 | F01.PB44077 | 137 | 1836 | 1 | 133 | 526 | 2229 | 24 | 156 |
| F01.PB29199 | F01.PB25347 | 503 | 2013 | 72 | 503 | 622 | 2128 | 1 | 431 |
| F01.PB40582 | F01.PB46468 | 107 | 1034 | 371 | 107 | 6494 | 7421 | 1134 | 1398 |
| F01.PB45418 | F01.PB45291 | 1 | 2612 | 2608 | 3453 | 6 | 2617 | 2836 | 3681 |
| F01.PB32953 | F01.PB45739 | 277 | 2907 | 1 | 279 | 586 | 3216 | 1 | 279 |
| F01.PB43547 | F01.PB22603 | 1 | 1683 | 1681 | 2197 | 91 | 1773 | 2045 | 2561 |
| F01.PB34061 | F01.PB45689 | 1 | 2460 | 2458 | 2713 | 232 | 2691 | 2801 | 3056 |
| F01.PB29733 | F01.PB36932 | 73 | 1236 | 1236 | 107 | 2204 | 3371 | 1071 | 2204 |
| F01.PB15939 | F01.PB19080 | 328 | 1115 | 53 | 330 | 1195 | 1982 | 54 | 331 |
| F01.PB11206 | F01.PB34403 | 295 | 1570 | 6 | 298 | 1421 | 2698 | 1 | 294 |
| F01.PB34570 | F01.PB38262 | 109 | 2633 | 1 | 110 | 492 | 3007 | 1 | 110 |
| F01.PB45439 | F01.PB36640 | 157 | 3010 | 1 | 161 | 740 | 3593 | 107 | 267 |
| F01.PB30551 | F01.PB25426 | 1062 | 2319 | 1 | 1064 | 1255 | 2511 | 1 | 1064 |
| F01.PB19999 | F01.PB29839 | 228 | 1862 | 7 | 230 | 511 | 2146 | 19 | 242 |
| F01.PB21754 | F01.PB33186 | 211 | 2592 | 1 | 212 | 425 | 2824 | 64 | 274 |
| F01.PB20893 | F01.PB22066 | 1 | 2158 | 2155 | 2326 | 1 | 2182 | 2434 | 2605 |
| F01.PB8535 | F01.PB41271 | 243 | 995 | 1 | 247 | 602 | 1364 | 93 | 339 |
| F01.PB25271 | F01.PB24933 | 1 | 1953 | 1952 | 2106 | 1 | 1954 | 2079 | 2233 |
| F01.PB23919 | F01.PB21284 | 1 | 1920 | 1919 | 2088 | 32 | 1945 | 2057 | 2226 |
| F01.PB41302 | F01.PB45642 | 1 | 1023 | 1022 | 1283 | 863 | 1886 | 3154 | 3415 |
| F01.PB31504 | F01.PB37824 | 1156 | 2740 | 1 | 1160 | 1556 | 3134 | 287 | 1429 |
| F01.PB5321 | F01.PB19737 | 1 | 1378 | 1379 | 1583 | 2 | 1380 | 1718 | 1923 |
| F01.PB23368 | F01.PB33524 | 274 | 2460 | 78 | 269 | 442 | 2629 | 1 | 192 |
| F01.PB31596 | F01.PB34812 | 1 | 1678 | 1678 | 2118 | 285 | 1961 | 2103 | 2543 |
| F01.PB34753 | F01.PB36674 | 314 | 2758 | 49 | 319 | 604 | 3042 | 41 | 311 |
| F01.PB19119 | F01.PB21878 | 631 | 1990 | 8 | 633 | 732 | 2073 | 1 | 628 |
| F01.PB43397 | F01.PB24031 | 1 | 1919 | 1916 | 2283 | 41 | 1959 | 2243 | 2611 |
| F01.PB5510 | F01.PB12779 | 183 | 1183 | 2 | 185 | 337 | 1342 | 1 | 199 |
| F01.PB16939 | F01.PB33270 | 179 | 1988 | 1 | 182 | 947 | 2753 | 13 | 194 |
| F01.PB26201 | F01.PB33645 | 132 | 2465 | 1 | 132 | 472 | 2808 | 1 | 133 |
| F01.PB11206 | F01.PB34499 | 295 | 1570 | 3 | 298 | 1448 | 2725 | 39 | 335 |
| F01.PB12818 | F01.PB21936 | 1 | 1287 | 1287 | 1563 | 53 | 1325 | 2314 | 2587 |
| F01.PB36097 | F01.PB35515 | 1 | 1560 | 1558 | 2421 | 63 | 1620 | 1971 | 2834 |
| F01.PB5506 | F01.PB33181 | 610 | 1314 | 9 | 609 | 1952 | 2654 | 1 | 601 |
| F01.PB21344 | F01.PB33960 | 563 | 2180 | 80 | 562 | 1134 | 2754 | 75 | 557 |
| F01.PB34587 | F01.PB35044 | 1198 | 2670 | 1 | 1200 | 1337 | 2801 | 36 | 1229 |
| F01.PB34325 | F01.PB33645 | 142 | 2484 | 1 | 142 | 472 | 2814 | 124 | 267 |
| F01.PB6026 | F01.PB16747 | 1 | 1250 | 1249 | 1487 | 1 | 1245 | 1499 | 1735 |
| F01.PB22260 | F01.PB31567 | 759 | 2671 | 88 | 762 | 825 | 2737 | 24 | 698 |
| F01.PB30565 | F01.PB31988 | 140 | 2576 | 1 | 140 | 282 | 2715 | 2 | 144 |
| F01.PB24492 | F01.PB30726 | 251 | 2223 | 5 | 252 | 871 | 2841 | 1 | 248 |
| F01.PB6194 | F01.PB42275 | 338 | 1346 | 47 | 340 | 1011 | 2019 | 1 | 294 |
| F01.PB5575 | F01.PB42564 | 99 | 1513 | 1 | 102 | 569 | 2001 | 85 | 186 |
| F01.PB34603 | F01.PB37581 | 1 | 2349 | 2348 | 2532 | 9 | 2357 | 3075 | 3259 |
| F01.PB29967 | F01.PB39202 | 401 | 2440 | 70 | 399 | 1364 | 3403 | 746 | 1075 |
| F01.PB30406 | F01.PB35893 | 1 | 1505 | 1507 | 2027 | 68 | 1572 | 1719 | 2242 |
| F01.PB23238 | F01.PB36008 | 12 | 1545 | 1546 | 2689 | 1 | 1534 | 1640 | 2783 |
| F01.PB18250 | F01.PB15784 | 157 | 1197 | 3 | 161 | 339 | 1368 | 14 | 175 |
| F01.PB27418 | F01.PB33394 | 604 | 2528 | 61 | 606 | 769 | 2694 | 82 | 627 |
| F01.PB30339 | F01.PB29896 | 281 | 2536 | 39 | 283 | 426 | 2683 | 1 | 246 |
| F01.PB35891 | F01.PB44137 | 461 | 2076 | 85 | 461 | 784 | 2399 | 1 | 377 |
| F01.PB21907 | F01.PB42147 | 281 | 2235 | 47 | 283 | 452 | 2404 | 1 | 237 |
| F01.PB36336 | F01.PB39463 | 758 | 3012 | 8 | 756 | 956 | 3215 | 1 | 748 |
| F01.PB42392 | F01.PB44207 | 177 | 2267 | 13 | 179 | 328 | 2418 | 1 | 167 |
| F01.PB30912 | F01.PB42308 | 1 | 1927 | 1922 | 2312 | 138 | 2064 | 2302 | 2692 |
| F01.PB35888 | F01.PB43077 | 1174 | 2349 | 1 | 1174 | 1295 | 2470 | 3 | 1178 |
| F01.PB20251 | F01.PB42966 | 1 | 1682 | 1681 | 1939 | 43 | 1725 | 1830 | 2084 |
| F01.PB33243 | F01.PB32055 | 401 | 2657 | 7 | 405 | 512 | 2781 | 1 | 399 |
| F01.PB44395 | F01.PB44504 | 245 | 2675 | 1 | 246 | 352 | 2782 | 5 | 250 |
| F01.PB26092 | F01.PB24689 | 128 | 2017 | 1 | 130 | 476 | 2368 | 170 | 299 |
| F01.PB33175 | F01.PB34689 | 1212 | 2505 | 106 | 1214 | 1224 | 2519 | 1 | 1113 |
| F01.PB16876 | F01.PB43907 | 1 | 1065 | 1064 | 1664 | 52 | 1118 | 1308 | 1909 |
| F01.PB33374 | F01.PB37812 | 170 | 2981 | 1 | 174 | 865 | 3676 | 1 | 165 |
| F01.PB17912 | F01.PB27457 | 1 | 1588 | 1586 | 1967 | 28 | 1615 | 1732 | 2113 |
| F01.PB28454 | F01.PB35256 | 1 | 1717 | 1713 | 2314 | 46 | 1762 | 2063 | 2678 |
| F01.PB34594 | F01.PB44456 | 396 | 2468 | 74 | 396 | 678 | 2750 | 21 | 343 |
| F01.PB40961 | F01.PB25517 | 102 | 1538 | 1 | 101 | 524 | 1944 | 1 | 101 |
| F01.PB33674 | F01.PB38147 | 2765 | 972 | 1013 | 2765 | 297 | 2087 | 2085 | 3834 |
| F01.PB33770 | F01.PB29150 | 131 | 2376 | 1 | 133 | 325 | 2571 | 1 | 133 |
| F01.PB35000 | F01.PB31663 | 1 | 2589 | 2592 | 2794 | 12 | 2600 | 2713 | 2914 |
| F01.PB34084 | F01.PB37400 | 1 | 1644 | 1644 | 2864 | 102 | 1742 | 2010 | 3230 |
| F01.PB10426 | F01.PB30575 | 1 | 1164 | 1161 | 1389 | 31 | 1189 | 2377 | 2605 |
| F01.PB31251 | F01.PB39054 | 1 | 2076 | 2077 | 2540 | 1174 | 3249 | 3488 | 3949 |
| F01.PB28454 | F01.PB35526 | 1 | 1717 | 1713 | 2378 | 7 | 1725 | 2026 | 2707 |
| F01.PB37109 | F01.PB39236 | 2994 | 915 | 1019 | 2994 | 181 | 2252 | 2249 | 4223 |
| F01.PB29516 | F01.PB34307 | 1208 | 2411 | 103 | 1212 | 1508 | 2712 | 205 | 1314 |
| F01.PB36084 | F01.PB23055 | 573 | 2334 | 69 | 573 | 730 | 2491 | 1 | 505 |
| F01.PB30381 | F01.PB32194 | 179 | 2292 | 1 | 182 | 706 | 2813 | 9 | 188 |
| F01.PB20788 | F01.PB25224 | 130 | 2081 | 1 | 131 | 503 | 2447 | 1 | 123 |
| F01.PB21092 | F01.PB27371 | 343 | 2537 | 58 | 345 | 434 | 2619 | 1 | 287 |
| F01.PB38887 | F01.PB45461 | 1 | 3027 | 3026 | 3538 | 25 | 3052 | 3167 | 3679 |
| F01.PB37851 | F01.PB39551 | 1 | 3320 | 3316 | 3511 | 1 | 3326 | 3452 | 3646 |
| F01.PB28734 | F01.PB27368 | 12 | 1726 | 1723 | 2010 | 11 | 1724 | 1835 | 2122 |
| F01.PB28248 | F01.PB38101 | 119 | 2060 | 1 | 120 | 2181 | 4122 | 1613 | 1732 |
| F01.PB43318 | F01.PB44559 | 1 | 1123 | 1124 | 2186 | 1 | 1123 | 1548 | 2610 |
| F01.PB43084 | F01.PB32470 | 115 | 2051 | 1 | 114 | 352 | 2288 | 33 | 146 |
| F01.PB27455 | F01.PB30006 | 133 | 2053 | 1 | 132 | 294 | 2219 | 1 | 132 |
| F01.PB33374 | F01.PB37080 | 170 | 2895 | 1 | 174 | 867 | 3590 | 4 | 168 |
| F01.PB21292 | F01.PB24046 | 1 | 1076 | 1076 | 1949 | 5 | 1080 | 1182 | 2055 |
| F01.PB34548 | F01.PB44548 | 1150 | 2584 | 1 | 1153 | 1299 | 2733 | 4 | 1157 |
| F01.PB22295 | F01.PB36776 | 1106 | 2257 | 1 | 1107 | 2152 | 3303 | 919 | 2025 |
| F01.PB35819 | F01.PB31087 | 102 | 2080 | 2081 | 2871 | 1 | 1980 | 2082 | 2872 |
| F01.PB27128 | F01.PB26034 | 1 | 1190 | 1188 | 2012 | 34 | 1205 | 1528 | 2352 |
| F01.PB24538 | F01.PB44657 | 1 | 2076 | 2073 | 2418 | 1 | 2095 | 2199 | 2544 |
| F01.PB27857 | F01.PB44326 | 1 | 1765 | 1765 | 2215 | 95 | 1856 | 2008 | 2458 |
| F01.PB16115 | F01.PB42966 | 1 | 1698 | 1697 | 1985 | 28 | 1725 | 1830 | 2116 |
| F01.PB11819 | F01.PB19937 | 1 | 1409 | 1409 | 1538 | 32 | 1439 | 1616 | 1742 |
| F01.PB14899 | F01.PB27195 | 1 | 1225 | 1223 | 1407 | 26 | 1250 | 1955 | 2139 |
| F01.PB16125 | F01.PB32324 | 1 | 1044 | 1043 | 1914 | 36 | 1079 | 1192 | 2064 |
| F01.PB43938 | F01.PB43692 | 1 | 1776 | 1776 | 2344 | 1 | 1776 | 1878 | 2446 |
| F01.PB33879 | F01.PB37425 | 101 | 2815 | 1 | 103 | 278 | 2992 | 58 | 159 |
| F01.PB11503 | F01.PB30171 | 1 | 1059 | 1054 | 1627 | 1 | 1056 | 1490 | 2063 |
| F01.PB44140 | F01.PB34698 | 194 | 2045 | 1 | 195 | 337 | 2185 | 1 | 195 |
| F01.PB27594 | F01.PB30747 | 699 | 2363 | 93 | 703 | 1242 | 2907 | 99 | 709 |
| F01.PB10934 | F01.PB10064 | 1 | 1092 | 1089 | 1383 | 51 | 1143 | 1500 | 1794 |
| F01.PB21925 | F01.PB29093 | 331 | 2267 | 5 | 334 | 445 | 2378 | 1 | 329 |
| F01.PB22541 | F01.PB21246 | 297 | 2134 | 57 | 297 | 348 | 2185 | 1 | 242 |
| F01.PB10304 | F01.PB25871 | 200 | 1664 | 3 | 203 | 1247 | 2714 | 853 | 1052 |
| F01.PB36232 | F01.PB36830 | 22 | 2614 | 2613 | 3165 | 1 | 2592 | 2700 | 3252 |
| F01.PB28018 | F01.PB21483 | 12 | 1505 | 1510 | 2477 | 1 | 1494 | 1607 | 2555 |
| F01.PB44616 | F01.PB38931 | 1238 | 2588 | 1 | 1243 | 1511 | 2858 | 16 | 1258 |
| F01.PB30679 | F01.PB23650 | 225 | 2220 | 51 | 227 | 291 | 2286 | 1 | 178 |
| F01.PB37319 | F01.PB38085 | 199 | 3515 | 1 | 201 | 430 | 3741 | 1 | 199 |
| F01.PB29970 | F01.PB33084 | 1269 | 2585 | 1 | 1268 | 1424 | 2722 | 2 | 1250 |
| F01.PB45439 | F01.PB38691 | 157 | 3010 | 1 | 161 | 667 | 3520 | 76 | 236 |
| F01.PB20737 | F01.PB34283 | 132 | 2390 | 1 | 134 | 327 | 2586 | 1 | 133 |
| F01.PB35881 | F01.PB33942 | 332 | 2379 | 80 | 336 | 814 | 2861 | 1 | 257 |
| F01.PB21911 | F01.PB42560 | 1 | 1360 | 1363 | 2042 | 2 | 1367 | 1555 | 2234 |
| F01.PB11178 | F01.PB16528 | 174 | 1394 | 23 | 176 | 604 | 1823 | 1 | 154 |
| F01.PB19482 | F01.PB44801 | 517 | 1908 | 67 | 519 | 1150 | 2545 | 32 | 478 |
| F01.PB44290 | F01.PB44516 | 1039 | 2717 | 1 | 1044 | 1219 | 2897 | 36 | 1078 |
| F01.PB44371 | F01.PB37850 | 396 | 2879 | 91 | 396 | 594 | 3098 | 1 | 306 |
| F01.PB17871 | F01.PB45732 | 278 | 1928 | 46 | 278 | 1431 | 3086 | 1 | 235 |
| F01.PB40193 | F01.PB19939 | 149 | 1496 | 1 | 149 | 434 | 1780 | 41 | 189 |
| F01.PB8123 | F01.PB6035 | 207 | 1452 | 45 | 204 | 263 | 1509 | 1 | 160 |
| F01.PB14899 | F01.PB32018 | 1 | 1225 | 1223 | 1407 | 20 | 1239 | 2057 | 2240 |
| F01.PB18457 | F01.PB40118 | 5 | 537 | 538 | 993 | 1 | 533 | 955 | 1409 |
| F01.PB16876 | F01.PB17316 | 1 | 1065 | 1063 | 1664 | 6 | 1072 | 1286 | 1887 |
| F01.PB18112 | F01.PB28287 | 173 | 1736 | 1 | 172 | 566 | 2131 | 1 | 173 |
| F01.PB8304 | F01.PB10971 | 1 | 486 | 484 | 960 | 16 | 501 | 696 | 1172 |
| F01.PB11178 | F01.PB17574 | 178 | 1394 | 23 | 176 | 733 | 1947 | 1 | 154 |
| F01.PB27595 | F01.PB42467 | 1 | 1738 | 1738 | 2037 | 4 | 1741 | 2262 | 2558 |
| F01.PB22818 | F01.PB23579 | 1 | 1811 | 1816 | 2431 | 7 | 1801 | 1913 | 2524 |
| F01.PB20765 | F01.PB35549 | 175 | 2395 | 1 | 177 | 342 | 2566 | 1 | 177 |
| F01.PB25540 | F01.PB37887 | 1050 | 2168 | 1 | 1051 | 2496 | 3613 | 1349 | 2390 |
| F01.PB22431 | F01.PB38681 | 151 | 2886 | 1 | 153 | 317 | 3057 | 52 | 204 |
| F01.PB36200 | F01.PB30319 | 1 | 1339 | 1340 | 2294 | 24 | 1362 | 1475 | 2429 |
| F01.PB44338 | F01.PB36924 | 110 | 2766 | 1 | 109 | 446 | 3098 | 8 | 116 |
| F01.PB29333 | F01.PB31550 | 203 | 2084 | 1 | 202 | 368 | 2280 | 4 | 212 |
| F01.PB24538 | F01.PB23579 | 1 | 1795 | 1793 | 2417 | 7 | 1801 | 1905 | 2524 |
| F01.PB16147 | F01.PB27851 | 1 | 1077 | 1078 | 1940 | 11 | 1087 | 1396 | 2259 |
| F01.PB26652 | F01.PB28180 | 13 | 1552 | 1552 | 2003 | 13 | 1552 | 1692 | 2143 |
| F01.PB42514 | F01.PB44165 | 1 | 1158 | 1156 | 2157 | 22 | 1179 | 1485 | 2486 |
| F01.PB34521 | F01.PB33133 | 1 | 1287 | 1287 | 2571 | 4 | 1290 | 1530 | 2813 |
| F01.PB34328 | F01.PB24123 | 1 | 1344 | 1343 | 2578 | 113 | 1454 | 1561 | 2796 |
| F01.PB36880 | F01.PB37953 | 1 | 2422 | 2426 | 3396 | 1 | 2394 | 2543 | 3510 |
| F01.PB20752 | F01.PB32701 | 1 | 1664 | 1662 | 2208 | 1 | 1664 | 2041 | 2587 |
| F01.PB37896 | F01.PB36573 | 271 | 3455 | 1 | 270 | 529 | 3717 | 43 | 315 |
| F01.PB36009 | F01.PB22979 | 1 | 1920 | 1917 | 2252 | 1 | 1908 | 2028 | 2353 |
| F01.PB10300 | F01.PB21978 | 133 | 1372 | 1 | 132 | 897 | 2136 | 1 | 132 |
| F01.PB39576 | F01.PB38643 | 12 | 1871 | 1870 | 3554 | 1 | 1865 | 1988 | 3669 |
| F01.PB19212 | F01.PB30098 | 115 | 1851 | 1 | 116 | 539 | 2277 | 2 | 117 |
| F01.PB23619 | F01.PB23905 | 329 | 2359 | 6 | 329 | 500 | 2540 | 1 | 324 |
| F01.PB45681 | F01.PB39308 | 181 | 3274 | 17 | 181 | 383 | 3483 | 1 | 165 |
| F01.PB31721 | F01.PB31277 | 1153 | 2518 | 1 | 1153 | 1255 | 2620 | 2 | 1155 |
| F01.PB36784 | F01.PB45973 | 104 | 3181 | 3180 | 3391 | 1 | 3077 | 3181 | 3392 |
| F01.PB24321 | F01.PB23474 | 1 | 1850 | 1849 | 2086 | 1 | 1832 | 1933 | 2171 |
| F01.PB21171 | F01.PB24230 | 110 | 2052 | 1 | 110 | 214 | 2156 | 2 | 111 |
| F01.PB42301 | F01.PB43054 | 1 | 1291 | 1289 | 1932 | 14 | 1304 | 1623 | 2266 |
| F01.PB34328 | F01.PB21055 | 1 | 1344 | 1343 | 2562 | 102 | 1445 | 1552 | 2771 |
| F01.PB44174 | F01.PB24851 | 210 | 2330 | 1 | 209 | 349 | 2476 | 1 | 208 |
| F01.PB23368 | F01.PB30815 | 274 | 2456 | 36 | 269 | 595 | 2779 | 1 | 234 |
| F01.PB21190 | F01.PB28660 | 218 | 2369 | 1 | 217 | 565 | 2707 | 6 | 220 |
| F01.PB37547 | F01.PB36493 | 1 | 1910 | 1914 | 3482 | 68 | 1976 | 2107 | 3675 |
| F01.PB43545 | F01.PB22804 | 1 | 1707 | 1702 | 2166 | 96 | 1811 | 1947 | 2409 |
| F01.PB16734 | F01.PB20562 | 1 | 1026 | 1022 | 1288 | 98 | 1123 | 1240 | 1505 |
| F01.PB25589 | F01.PB24835 | 239 | 2445 | 1 | 240 | 421 | 2617 | 57 | 296 |
| F01.PB21720 | F01.PB24617 | 111 | 2310 | 1 | 113 | 445 | 2640 | 30 | 140 |
| F01.PB21884 | F01.PB31403 | 220 | 2774 | 1 | 223 | 421 | 2977 | 9 | 231 |
| F01.PB27521 | F01.PB23421 | 223 | 2028 | 25 | 226 | 324 | 2129 | 1 | 202 |
| F01.PB13835 | F01.PB23425 | 170 | 1493 | 2 | 169 | 826 | 2142 | 1 | 157 |
| F01.PB28930 | F01.PB34570 | 1 | 1998 | 1993 | 2386 | 1 | 2002 | 2240 | 2633 |
| F01.PB32317 | F01.PB34581 | 1 | 1530 | 1525 | 2655 | 2 | 1531 | 1654 | 2780 |
| F01.PB21002 | F01.PB31204 | 171 | 2531 | 10 | 170 | 353 | 2715 | 1 | 161 |
| F01.PB30592 | F01.PB21920 | 131 | 2169 | 1 | 134 | 603 | 2644 | 269 | 400 |
| F01.PB31251 | F01.PB31562 | 1 | 2076 | 2077 | 2540 | 21 | 2096 | 2335 | 2796 |
| F01.PB22796 | F01.PB38081 | 144 | 2317 | 1 | 144 | 1090 | 3275 | 1 | 148 |
| F01.PB42441 | F01.PB31439 | 1 | 1660 | 1659 | 2668 | 1 | 1654 | 1797 | 2806 |
| F01.PB33804 | F01.PB38011 | 110 | 2697 | 1 | 110 | 469 | 3053 | 73 | 179 |
| F01.PB34480 | F01.PB34589 | 337 | 2537 | 93 | 337 | 412 | 2612 | 9 | 252 |
| F01.PB24298 | F01.PB32749 | 259 | 2229 | 45 | 262 | 768 | 2738 | 42 | 259 |
| F01.PB35582 | F01.PB31403 | 219 | 2771 | 1 | 222 | 421 | 2976 | 12 | 231 |
| F01.PB28212 | F01.PB41383 | 1 | 1689 | 1687 | 2038 | 128 | 1821 | 1969 | 2320 |
| F01.PB25203 | F01.PB43229 | 1395 | 103 | 2312 | 1393 | 1146 | 2438 | 20 | 939 |
| F01.PB36589 | F01.PB45798 | 1 | 2452 | 2452 | 3442 | 2 | 2453 | 2559 | 3549 |
| F01.PB23051 | F01.PB31000 | 142 | 2794 | 1 | 141 | 333 | 2985 | 4 | 144 |
| F01.PB26247 | F01.PB35914 | 138 | 2034 | 1 | 138 | 436 | 2333 | 1 | 135 |
| F01.PB41349 | F01.PB29853 | 468 | 1335 | 50 | 469 | 1168 | 2033 | 1 | 420 |
| F01.PB34901 | F01.PB38744 | 1121 | 2936 | 1 | 1121 | 1745 | 3559 | 307 | 1428 |
| F01.PB43015 | F01.PB36637 | 11 | 1760 | 1757 | 2745 | 1 | 1750 | 2288 | 3276 |
| F01.PB34483 | F01.PB34673 | 1190 | 2601 | 1 | 1192 | 1308 | 2719 | 3 | 1190 |
| F01.PB36439 | F01.PB38231 | 1 | 2643 | 2643 | 3281 | 2 | 2659 | 2865 | 3504 |
| F01.PB25125 | F01.PB23665 | 369 | 2214 | 51 | 368 | 710 | 2562 | 248 | 565 |
| F01.PB20888 | F01.PB29131 | 1 | 1751 | 1749 | 2425 | 1 | 1751 | 2001 | 2677 |
| F01.PB37495 | F01.PB37014 | 451 | 3126 | 57 | 450 | 853 | 3528 | 228 | 621 |
| F01.PB22487 | F01.PB32536 | 203 | 2031 | 1 | 202 | 626 | 2455 | 97 | 301 |
